# Supplementary material for: MicroRNA-449a enhances radiosensitivity by downregulation of c-Myc in prostate cancer cells
Source: PubMed Central journal article supplement (PMC4890029; doi:10.1038/srep27346), 2016-06-02
Supplement: srep27346-s1.pdf [file srep27346-s1.pdf]

# MicroR-449a enhances radiosensitivity by downregulation of c-Myc in prostate cancer cells

Aihong Mao<sup>1, 2, 3, 6</sup>, Qiuyue Zhao<sup>1, 4, 5, 6</sup>, Xin Zhou<sup>1, 4, 5</sup>, Chao Sun<sup>1, 4, 5</sup>,

Jing Si<sup>1, 4, 5</sup>, Rong Zhou<sup>1, 4, 5</sup>, Lu Gan<sup>1, 4, 5</sup>, Hong Zhang<sup>1, 4, 5\*</sup>

## Supplementary tables

**Table S1** Primer sequences of miR-449a, b, c and RNU6

| Gene     | Sequence                        |                          |
|----------|---------------------------------|--------------------------|
| miR-449a | 5'-TGGCAGTGTATTGTTAGCTGGT-3'    |                          |
| miR-449b | 5'-AGGCAGTGTATTGTTAGCTGGC-3'    |                          |
| MiR-449c | 5'-TAGGCAGTGTATTGCTAGCGGCTGT-3' |                          |
| RNU6     | F                               | 5'-CTCGCTTCGGCAG CACA-3' |
|          | R                               | 5'-AACGCTTCACGAATTG-3'   |

**Table S2** Primer sequences for c-Myc and GADPH

| Gene  | Sequence |                              |
|-------|----------|------------------------------|
| c-Myc | F        | 5'-GCAGCTGCTTAGACGCTGGA-3'   |
|       | R        | 5'-CGCAGTAGAAATACGGCTGCAC-3' |
| GADPH | F        | 5'-TCGCTCTCTGCTCCTCCTGTTC-3' |
|       | R        | 5'-CGCCCAATACGACCAAATCC-3'   |

**Table S3** miRNA/Oligonucleotide sequences for expression miR-449a inserted GV214 vector

| Gene     | Sequence                                                                                                                                                                                                                                                                                                                        |
|----------|---------------------------------------------------------------------------------------------------------------------------------------------------------------------------------------------------------------------------------------------------------------------------------------------------------------------------------|
| miR-449a | 5'- <u>CGGATCCATTGTTAGCTGGCTGCTTGGGTC</u> AAGTCAGCAGCCACA<br>ACTACCCTGCCACTTGCTTCTGGATAAATTCTTCTTGTC AATGAAGTG<br>CTCTGGATACCTGTGTGTGATGAGC <u>TGGCAGTGTATTGTTAGCTGGTT</u><br>GAATATGTGAATGGCATCGGCTAACATGCAACTGCTGTCTTATTGCATA<br>TACAATGAACATCAGAGTGTA ACTGAATCTGTAATTAGTGTGTGTTTA<br>TGTGTACTTTCTGCTATGAAG <u>CAAGCT</u> -3' |
| miR-con  | 5'-TTCTCCGAACGTGTCACGT-3'                                                                                                                                                                                                                                                                                                       |

**Table S4** SiRNA sequences for targeting c-Myc

| miRNA/siRNA   | Sequence                                                    |
|---------------|-------------------------------------------------------------|
| Anti-miR-449a | 5'-AUCGGCUAACAUGCAACUGCUG-3'                                |
| Anti-NC       | 5'-UCUACUGUCACUCAGUAGUUU-3'                                 |
| si-c-Myc1(S1) | 5'- GCUUCACCAACAGGAACUATT-3'<br>3'-TTCGAAGUGGUUGUCCUUGAU-5' |
| si-c-Myc2(S2) | 5'- GGAAACGACGAGAACAGUUTT-3'<br>3'-TTCCUUUGCUGCUCUUGUCA-5'  |
| si-c-Myc3(S3) | 5'- CCACACAUCAGCACAACUATT-3'<br>3'-TTGGUGUGUAGUCGUGUUGAU-5' |
| NC            | 5'- UUCUCCGAACGUGUCACGUTT-3'<br>3'-TTAAGAGGCUUGCACAGUGCA-5' |

**Table S5** Oligonucleotide sequences for c-Myc-3'UTR and c-Myc-3'UTR mutant

| Oligonucleotide | Sequence                                                                                                                                                                                                                              |
|-----------------|---------------------------------------------------------------------------------------------------------------------------------------------------------------------------------------------------------------------------------------|
| c-Myc-3'UTR     | <u>TCTAGA</u> AATGTCCTGAGCAATCACCTATGAACTTGTTTCAAATGCA<br>TGATCAAATGCAACCTCACAACCTTGGCTGAGTCTTGAGACTGA<br>AAGATTTAGCCATAATGTAAACTGCCTCAAATTGGACTTTGGGCA<br>TAAAAGAACTTTTTTATGCTTACCATCTTTTTTTTTTCTTTAACAG<br>ATTTGTATTTAAGAATTGTCTAGA |
| c-Myc-3'UTR MUT | <u>TCTAGA</u> AATGTCCTGAGCAATCACCTATGAACTTGTTTCAAATGCA<br>TGATCAAATGCAACCTCACAACCTTGGCTGAGTCTTGAGACTGA<br>AAGATTTAGCCATAATGATGTGACGGTCAAATTGGACTTTGGGCA<br>TAAAAGAACTTTTTTATGCTTACCATCTTTTTTTTTTCTTTAACAG<br>ATTTGTATTTAAGAATTGTCTAGA |

Supplementary figures and figure legends

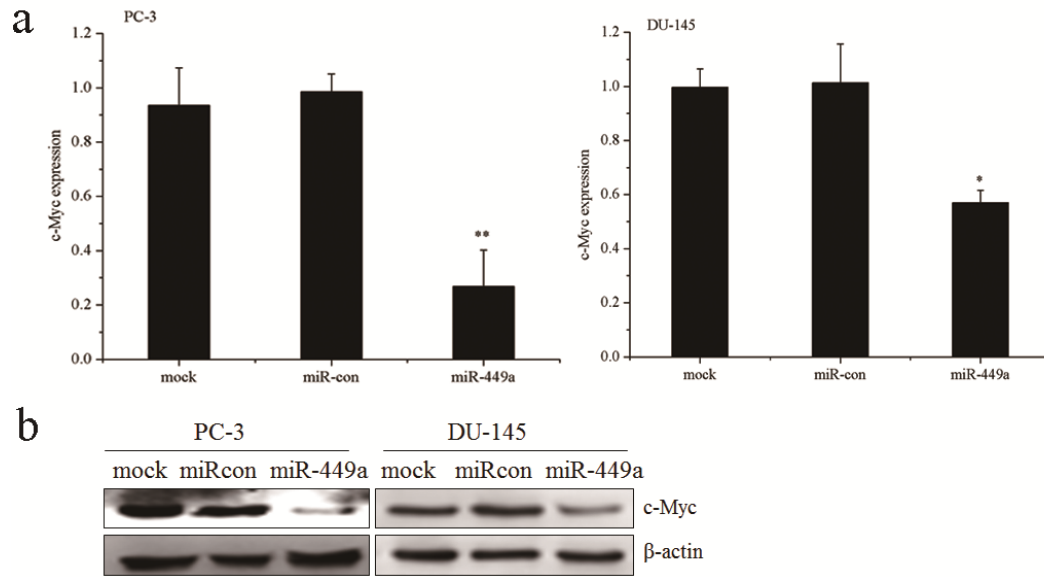

**Figure S1. c-Myc was downregulated by miR-449a in prostate cancer cells. (a)** The effect of miR-449a on c-Myc mRNA expression in PC-3 and DU-145 cells, versus control. **(b)** The effect of miR-449a on c-Myc protein expression in PC-3 and DU-145 cells. \* $P < 0.05$  and \*\* $P < 0.01$ .

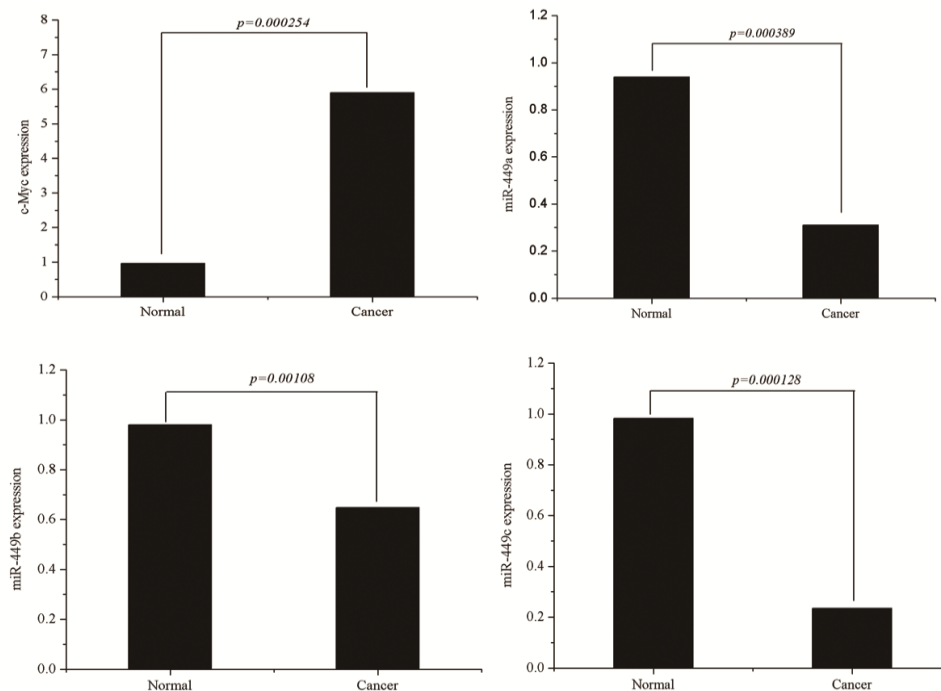

**Figure S2. c-Myc and miR-449a/b/c were expressed in prostate cancer tissues.**  
 Real-time RT-PCR analysis of mature miR-449a/b/c and c-Myc expression in prostate cancer and normal prostatic tissues prepared from the same patients.

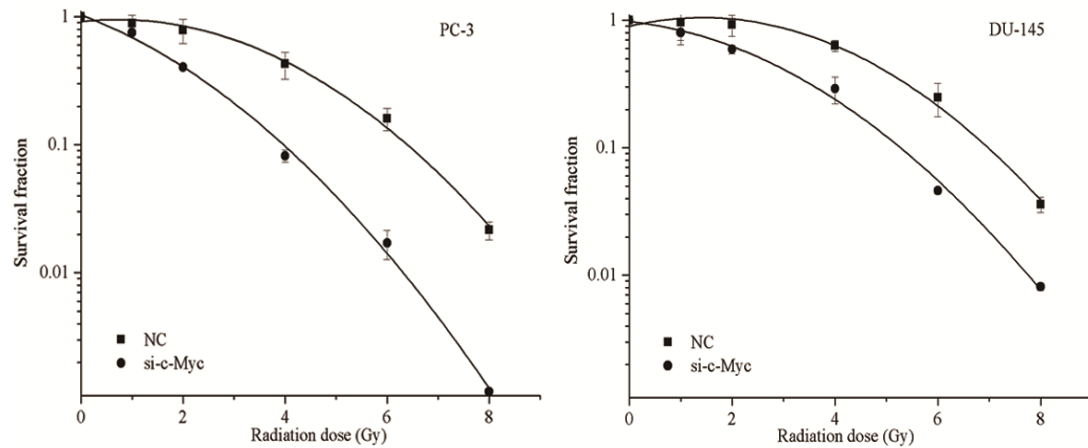

**Figure S3. Knockdown of c-Myc enhanced the radiosensitivity of PC-3 and DU-145 cells to IR.**

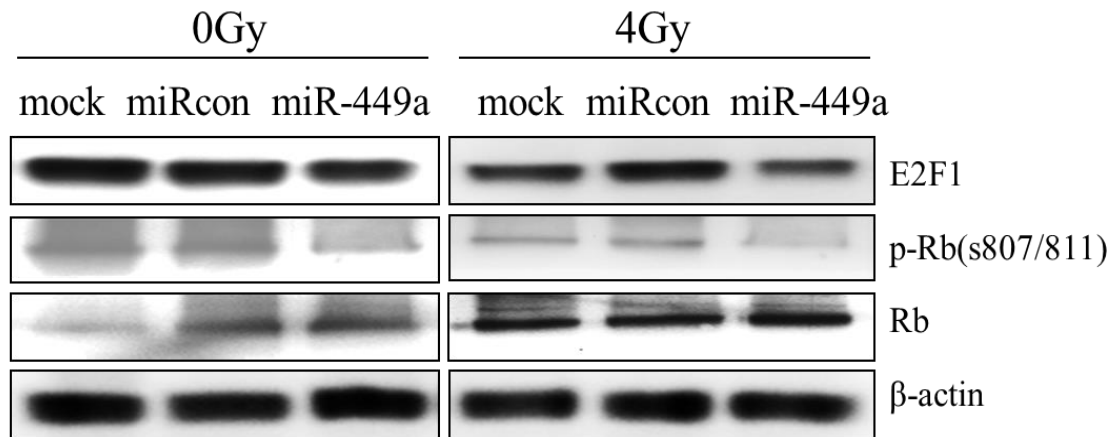

**Figure S4. MiR-449a regulated Rb/E2F1 and Rb phosphorylation in response to IR.**
